# Supplementary material for: Molecular-level insight into the low-k properties and regulatory mechanisms of polybenzoxazines
Source: Royal Society of Chemistry journal article supplement (doi:10.1039/d3py00556a), 2023-01-01
Supplement: d3py00556a1.pdf [file d3py00556a1.pdf]

## Supplementary Information

# Molecular-level Insight into the Low-*k* Properties and Regulatory Mechanisms of Polybenzoxazines

Manlin Yuan,<sup>[a]</sup> Xin Lu,<sup>[a]</sup> Shiao-Wei Kuo,<sup>[b]</sup> and Zhong Xin\*<sup>[a]</sup>

### Table of Contents

|                                                                                                 |     |
|-------------------------------------------------------------------------------------------------|-----|
| S1. Experimental Procedures.....                                                                | S2  |
| S1.1 Materials.....                                                                             | S2  |
| S1.2 Synthesis of benzoxazine prepolymer C-aptmds.....                                          | S2  |
| S1.3 Synthesis of benzoxazine prepolymer BZ-aptmds.....                                         | S2  |
| S1.4 Synthesis of benzoxazine prepolymer CBZ-aptmds.....                                        | S2  |
| S1.5 Preparation of polybenzoxazines .....                                                      | S2  |
| S1.6 Measurements and characterizations .....                                                   | S2  |
| S1.7 Computational Methods .....                                                                | S2  |
| S2. Results and Discussion.....                                                                 | S3  |
| <sup>1</sup> H NMR spectrum of C-aptmds .....                                                   | S3  |
| <sup>1</sup> H NMR spectrum of BZ-aptmds .....                                                  | S3  |
| <sup>29</sup> Si NMR spectrum of C-aptmds.....                                                  | S3  |
| <sup>29</sup> Si NMR spectrum of BZ-aptmds.....                                                 | S4  |
| <sup>29</sup> Si NMR spectrum of CBZ-aptmds.....                                                | S4  |
| Flowchart for implementing ring-opening polymerization of benzoxazine using perl language ..... | S4  |
| Summary of TGA and DMA results of polybenzoxazines .....                                        | S5  |
| Polarizability of each atom in PC-aptmds.....                                                   | S5  |
| Polarizability of each atom in PBZ-aptmds.....                                                  | S7  |
| Polarizability of each atom in PCBZ-aptmds.....                                                 | S9  |
| Summary of simulation results and dielectric properties .....                                   | S14 |

## S1. Experimental Procedures

**S1.1 Materials.** Trichloromethane and hydrochloric acid (35.0–38.0 wt%) were purchased from Sinopharm Chemical Reagent Co., Ltd. 1,3-bis(aminopropyl)tetramethyl disiloxane (aptmds), 4,4'-cyclohexylidenebisphenol, and N,N-dimethylformamide were obtained from Shanghai Macklin Biochemical Co., Ltd. Paraformaldehyde, 4-cyclohexylphenol, hexane, and sodium hydroxide were obtained from Shanghai Titan Scientific Co., Ltd. All chemicals were of analytical grade and used as received.

**S1.2 Synthesis of benzoxazine prepolymer C-aptmds.** Paraformaldehyde (2.40 g, 80 mmol), 1,3-bis(aminopropyl)tetramethyl disiloxane (4.97 g, 20 mmol), and trichloromethane were introduced in a flask mixed with a mechanical agitator and heated to 60 °C. Then, 4-cyclohexylphenol (7.05 g, 40 mmol) dissolved in trichloromethane was added to the mixture. The crude product was obtained after maintaining the reaction at 80 °C for 6 h. Then, the crude product was washed sequentially with NaOH aqueous, HCl aqueous, and deionized water. The solvent was removed using a rotary evaporator and the residual water was removed using freeze drying, obtaining a viscous reddish-brown liquid named C-aptmds (yield 89.6%).

**S1.3 Synthesis of benzoxazine prepolymer BZ-aptmds.** Paraformaldehyde (2.40 g, 80 mmol), 1,3-bis(aminopropyl)tetramethyl disiloxane (4.97 g, 20 mmol), 4,4'-cyclohexylidenebisphenol (5.37 g, 20 mmol) and trichloromethane were introduced in a flask mixed with a mechanical agitator and heated to 80 °C. The crude product was obtained after maintaining the reaction for 6 h. After the same washing process as C-aptmds, the crude product was added to hexane to precipitate. The precipitate was then dried to obtain a yellow powder named BZ-aptmds (yield 76.8%).

**S1.4 Synthesis of benzoxazine prepolymer CBZ-aptmds.** Paraformaldehyde (3.60 g, 120 mmol), 4-cyclohexylphenol (3.52 g, 20 mmol), 1,3-bis(aminopropyl)tetramethyl disiloxane (7.46 g, 30 mmol), 4,4'-cyclohexylidenebisphenol (5.37 g, 20 mmol) and trichloromethane were introduced in a flask mixed with a mechanical agitator and heated to 80 °C. The crude product was obtained after maintaining the reaction for 6 h. After the same washing process as C-aptmds, the crude product was added to hexane. The precipitate was filtered off and the solvent was removed to obtain a viscous yellow liquid named CBZ-aptmds (yield 58.3%).

**S1.5 Preparation of polybenzoxazines.** Polybenzoxazines were all prepared by mold casting. C-aptmds and CBZ-aptmds were poured directly into the mold and heated for 1 h in a vacuum drying oven at 70 °C. Then, PC-aptmds and PCBZ-aptmds were obtained after the following curing process: 120 °C (1 h), 150 °C (1 h), 180 °C (1 h), 200 °C (1 h), 210 °C (1 h), and 220 °C (6 h). BZ-aptmds was dissolved in N,N-dimethylformamide first and poured into the mold. PBZ-aptmds was obtained after the following curing process: 120 °C (1 h), 150 °C (1 h), and 180 °C (6 h).

**S1.6 Measurements and characterizations.** Fourier transform infrared spectroscopy (FT-IR) was obtained on a Thermo Fisher Scientific Nicolet IS10 analyzer using the KBr pellet method. Nuclear magnetic resonance spectroscopy (NMR) was recorded on a German Bruker AVANCE at a proton frequency of 600 MHz. Gel permeation chromatography (GPC) was recorded on an Agilent PL-GPC220. Differential scanning calorimetry (DSC) was carried out on a Q2000 TA instrument with a temperature rate of 10 °C/min and a nitrogen flow rate of 40 mL min<sup>-1</sup>. A TA Q500 thermogravimetric analyzer (TGA) was employed to characterize the mass loss from 40 to 800 °C at a temperature rate of 10 °C min<sup>-1</sup>. A Mettler-Toledo DMA1 dynamic mechanical analyzer (DMA) was used to determine the storage modulus E' and the loss factor Tan(δ) using double cantilever mode at a temperature rate of 3 °C min<sup>-1</sup>. Surface morphologies of the polybenzoxazines were observed with an FEI Nova NanoSEM 450 scanning electron microscopy (SEM). Wettability data were obtained through a Dataphysics OCA20 optical goniometer operating at room temperature. The water absorption test was conducted by IP-TM650-2.6.2.1. The dielectric properties in the range of 100 Hz to 1 MHz were tested at room temperature using a Novocontrol concept 40 broadband dielectric spectrometer.

**S1.7 Computational Methods.** MD simulation was carried out with COMPASS force field using the Forcite module in Materials Studio. Several benzoxazine monomer chains were packed in the periodic simulated box to ensure the total number of atoms was around 10000. The initial density of the periodic simulated box was set as 0.1 g cm<sup>-3</sup> to prevent ring spearing. NPT molecular dynamics equilibrium was performed by applying pressures of 0.5 GPa and 0.1 MPa to the box in turn. Then the Perl programming language was applied to realize the automated crosslinking reaction. The flowchart is shown in Figure S6 (Supporting Information), where Rn is the cutoff radius, Rmax is the max cutoff radius, R1 is the carbon atom in the ortho position of the phenoxy group and R2 is the carbon atom attached to the Oxygen atom in the oxazine ring. Rn was set as 2.0 Å and Rmax was set as 9.0 Å. The calculations of electronic and Van der Waals interactions using Ewald summation and atom-based method, respectively. Then, MD optimizations were employed according to the following procedures: (1) Anneal the box from 298 to 598 K; (2) Optimize the box by a 1 ns NPT ensemble; (3) Optimize the box by a 10 ns NVT ensemble.

Quantum chemical simulation was carried out with the Gaussian program. Firstly, geometric optimization and frequency analysis of repeating units were performed by the DFT method on the B3LYP theory level with 6-31G (d, p) as the basis set. Then, the B3LYP functional with 6-311G (d, p) was employed to analyze the energy, and the CAM-B3LYP functional with 6-311G++(d, p) was used to calculate polarizability. DFT-D3(BJ) was used for dispersion correction in all DFT simulations.

## S2. Results and Discussion

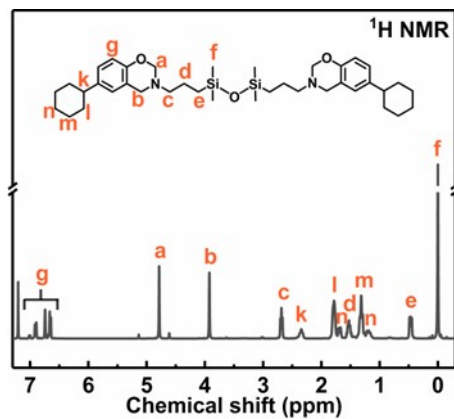

Figure S1. <sup>1</sup>H NMR spectrum of C-aptmDs.

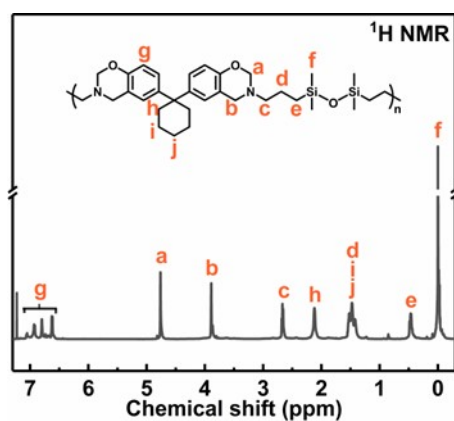

Figure S2 <sup>1</sup>H NMR spectrum of BZ-aptmDs.

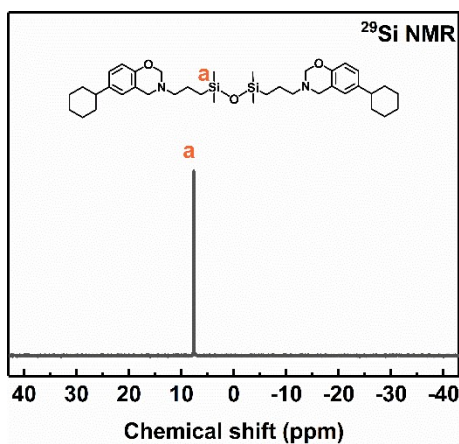

Figure S3 <sup>29</sup>Si NMR spectrum of C-aptmDs.

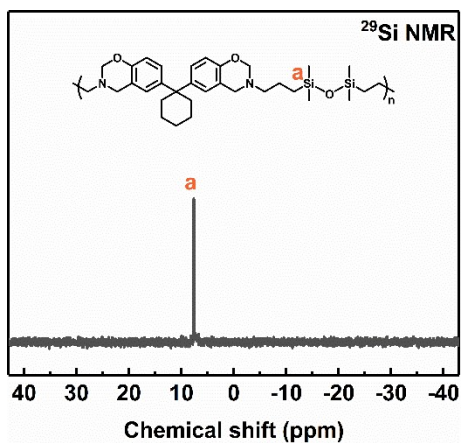

Figure S4  $^{29}\text{Si}$  NMR spectrum of BZ-aptmds.

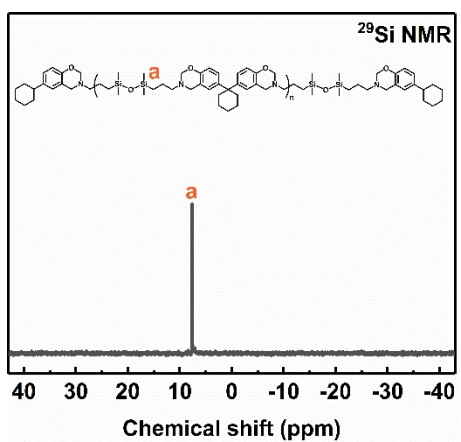

Figure S5  $^{29}\text{Si}$  NMR spectrum of CBZ-aptmds.

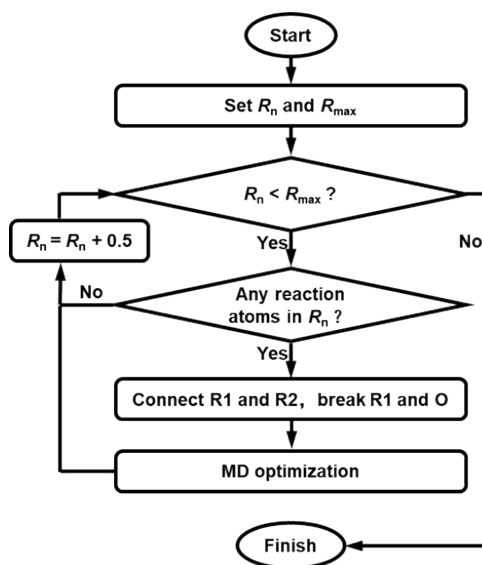

Figure S6. Flowchart for implementing ring-opening polymerization of benzoxazine using perl language.

**Table S1.** Summary of TGA and DMA results of polybenzoxazines.

| Samples     | $T_{5\%}$<br>(°C) | $T_{10\%}$<br>(°C) | CY<br>(%) | $E'$<br>(GPa) | $\rho_x$<br>(mol/cm <sup>3</sup> ) | $T_g$<br>(°C) | $T_{gDFT}$<br>(°C) |
|-------------|-------------------|--------------------|-----------|---------------|------------------------------------|---------------|--------------------|
| PC-aptmds   | 306               | 338                | 8.66      | 2.5           | 2.15E-3                            | 95            | 90                 |
| PBZ-aptmds  | 300               | 342                | 21.36     | 3.8           | 2.99E-3                            | 179           | 187                |
| PCBZ-aptmds | 314               | 344                | 12.70     | 3.0           | 2.95E-3                            | 132           | 115                |

**Table S2.** Polarizability of each atom in PC-aptmds.

| Atom  | Polarizability (a.u.) | Proportion of polarizability (%) |
|-------|-----------------------|----------------------------------|
| 1(C)  | 5.29108359            | 1.306925                         |
| 2(C)  | -6.06758028           | -1.498724                        |
| 3(C)  | -6.97774559           | -1.723539                        |
| 4(C)  | 2.90900887            | 0.71854                          |
| 5(C)  | 23.09754639           | 5.705214                         |
| 6(C)  | 25.12534141           | 6.206089                         |
| 7(H)  | -4.61003055           | -1.138701                        |
| 8(H)  | 23.8811899            | 5.898778                         |
| 9(H)  | 24.14710491           | 5.96446                          |
| 10(C) | -0.07817413           | -0.019309                        |
| 11(C) | 0.41063286            | 0.101428                         |
| 12(C) | 5.42634498            | 1.340335                         |
| 13(H) | -6.74408533           | -1.665824                        |
| 14(C) | 0.25145148            | 0.06211                          |
| 15(H) | 11.55776828           | 2.854829                         |
| 16(H) | -8.97873429           | -2.217794                        |
| 17(C) | 6.44730217            | 1.592517                         |
| 18(H) | 21.70620267           | 5.361544                         |
| 19(H) | 8.32898519            | 2.057302                         |
| 20(C) | 4.92145927            | 1.215626                         |
| 21(H) | -1.90519599           | -0.470593                        |
| 22(H) | -8.09784828           | -2.00021                         |
| 23(H) | 27.85433719           | 6.880166                         |
| 24(H) | -7.77102018           | -1.919482                        |
| 25(H) | 5.40592872            | 1.335292                         |
| 26(H) | 23.43131575           | 5.787656                         |
| 27(O) | 13.26298798           | 3.276027                         |
| 28(H) | -3.75490488           | -0.927481                        |
| 29(C) | 1.55448896            | 0.383967                         |
| 30(H) | 1.19873571            | 0.296094                         |
| 31(H) | 0.02162154            | 0.005341                         |
| 32(N) | 1.80080792            | 0.444809                         |
| 33(C) | 1.63855132            | 0.404731                         |
| 34(H) | 3.17384152            | 0.783955                         |
| 35(H) | 2.91503657            | 0.720029                         |
| 36(C) | 1.90562518            | 0.470699                         |
| 37(H) | 1.96659987            | 0.48576                          |
| 38(H) | 3.87908052            | 0.958153                         |
| 39(C) | 1.99924592            | 0.493824                         |

|        |              |           |
|--------|--------------|-----------|
| 40(H)  | 6.02408768   | 1.487981  |
| 41(H)  | 1.2694155    | 0.313552  |
| 42(C)  | 2.55088258   | 0.630081  |
| 43(H)  | 2.50024147   | 0.617573  |
| 44(H)  | 4.79040663   | 1.183255  |
| 45(H)  | 0.61230037   | 0.151241  |
| 46(Si) | 2.74566638   | 0.678194  |
| 47(O)  | 0.24691103   | 0.060988  |
| 48(Si) | 1.64906148   | 0.407327  |
| 49(C)  | 5.44417674   | 1.34474   |
| 50(H)  | 29.3760484   | 7.256036  |
| 51(H)  | 3.21723481   | 0.794674  |
| 52(C)  | 1.65369131   | 0.40847   |
| 53(H)  | -8.95106647  | -2.21096  |
| 54(H)  | 1.6459596    | 0.406561  |
| 55(C)  | 3.84003628   | 0.948509  |
| 56(H)  | 3.98096445   | 0.983319  |
| 57(H)  | 30.09372748  | 7.433307  |
| 58(N)  | -8.42059934  | -2.079932 |
| 59(C)  | 2.79806273   | 0.691136  |
| 60(H)  | -6.96786507  | -1.721099 |
| 61(H)  | 25.96963919  | 6.414635  |
| 62(H)  | 1.69679267   | 0.419117  |
| 63(C)  | 1.5504495    | 0.382969  |
| 64(H)  | 21.27498874  | 5.255032  |
| 65(H)  | -6.10737448  | -1.508553 |
| 66(H)  | -4.49437045  | -1.110133 |
| 67(C)  | 4.78313348   | 1.181459  |
| 68(H)  | -1.93271294  | -0.47739  |
| 69(H)  | 28.50544642  | 7.040993  |
| 70(H)  | -5.5652566   | -1.374647 |
| 71(C)  | 6.92226163   | 1.709834  |
| 72(H)  | -2.33697451  | -0.577245 |
| 73(H)  | 0.76162383   | 0.188125  |
| 74(H)  | 32.37848595  | 7.997654  |
| 75(C)  | 2.40349302   | 0.593675  |
| 76(H)  | 2.75005295   | 0.679277  |
| 77(H)  | 4.94525695   | 1.221504  |
| 78(H)  | 1.07442082   | 0.265388  |
| 79(C)  | 2.77923986   | 0.686487  |
| 80(H)  | 5.13555394   | 1.268508  |
| 81(H)  | 0.83365774   | 0.205918  |
| 82(H)  | 0.89835226   | 0.221898  |
| Sum    | 404.84981115 | 100       |

---

**Table S3.** Polarizability of each atom in PBZ-aptmds.

| Atom   | Polarizability (a.u.) | Proportion of polarizability (%) |
|--------|-----------------------|----------------------------------|
| 1(C)   | 5.10992903            | 1.172712                         |
| 2(C)   | 2.70562981            | 0.620933                         |
| 3(C)   | 2.89140100            | 0.663567                         |
| 4(C)   | 2.87721618            | 0.660312                         |
| 5(C)   | 3.04269805            | 0.698289                         |
| 6(C)   | 5.96278663            | 1.368440                         |
| 7(H)   | 0.44927197            | 0.103106                         |
| 8(H)   | 0.60480649            | 0.138801                         |
| 9(H)   | 4.30007133            | 0.986852                         |
| 10(C)  | 0.32367177            | 0.074282                         |
| 11(C)  | 1.36047557            | 0.312225                         |
| 12(C)  | 2.41790861            | 0.554902                         |
| 13(C)  | 1.26899495            | 0.291230                         |
| 14(H)  | -0.01903293           | -0.004368                        |
| 15(H)  | -0.36467386           | -0.083691                        |
| 16(C)  | 6.08803855            | 1.397185                         |
| 17(H)  | -3.16979822           | -0.727458                        |
| 18(H)  | 9.16246739            | 2.102757                         |
| 19(C)  | 2.62789041            | 0.603092                         |
| 20(H)  | -1.53353153           | -0.351941                        |
| 21(H)  | 6.01922688            | 1.381393                         |
| 22(H)  | 13.53155506           | 3.105448                         |
| 23(H)  | 15.34110074           | 3.520733                         |
| 24(H)  | 7.12562440            | 1.635308                         |
| 25(H)  | -2.65034218           | -0.608245                        |
| 26(O)  | 7.79104466            | 1.788019                         |
| 27(H)  | 5.27939329            | 1.211604                         |
| 28(C)  | 1.44436412            | 0.331477                         |
| 29(H)  | 0.27594483            | 0.063328                         |
| 30(H)  | 10.42693219           | 2.392947                         |
| 31(N)  | -0.38005154           | -0.087221                        |
| 32(C)  | 2.86549554            | 0.657622                         |
| 33(H)  | 17.52820006           | 4.022665                         |
| 34(H)  | 1.87282657            | 0.429808                         |
| 35(H)  | -1.31713219           | -0.302278                        |
| 36(C)  | 2.53270363            | 0.581247                         |
| 37(H)  | 16.54722358           | 3.797534                         |
| 38(H)  | -1.14199199           | -0.262083                        |
| 39(C)  | 2.10735130            | 0.483630                         |
| 40(H)  | 4.67573698            | 1.073066                         |
| 41(H)  | -1.03911623           | -0.238474                        |
| 42(C)  | 2.52391078            | 0.579229                         |
| 43(H)  | 12.67365175           | 2.908562                         |
| 44(H)  | -1.27257235           | -0.292051                        |
| 45(Si) | 0.60172174            | 0.138093                         |
| 46(O)  | -0.01083737           | -0.002487                        |

---

|        |              |           |
|--------|--------------|-----------|
| 47(Si) | 1.47522100   | 0.338558  |
| 48(C ) | 4.33598526   | 0.995095  |
| 49(H ) | 10.80076987  | 2.478742  |
| 50(H ) | 11.44455356  | 2.626488  |
| 51(C ) | 1.25357579   | 0.287692  |
| 52(H ) | -1.74854802  | -0.401286 |
| 53(H ) | -1.27680382  | -0.293022 |
| 54(C ) | 3.24695286   | 0.745165  |
| 55(H ) | 13.84150219  | 3.176580  |
| 56(H ) | 8.20910036   | 1.883962  |
| 57(N ) | -1.24987009  | -0.286841 |
| 58(C ) | 3.29546980   | 0.756300  |
| 59(H ) | -2.48333081  | -0.569916 |
| 60(H ) | 14.77863076  | 3.391648  |
| 61(H ) | 6.63175025   | 1.521965  |
| 62(C ) | 1.30987124   | 0.300611  |
| 63(H ) | 3.78776753   | 0.869280  |
| 64(H ) | -0.06457566  | -0.014820 |
| 65(H ) | 0.04387854   | 0.010070  |
| 66(C ) | 5.46794387   | 1.254875  |
| 67(H ) | -1.61978834  | -0.371736 |
| 68(H ) | 14.74452840  | 3.383821  |
| 69(H ) | 9.00462371   | 2.066532  |
| 70(C ) | 5.66935586   | 1.301099  |
| 71(H ) | 16.54151592  | 3.796224  |
| 72(H ) | 0.42526887   | 0.097598  |
| 73(H ) | 5.66739989   | 1.300650  |
| 74(C ) | 2.14270163   | 0.491743  |
| 75(H ) | 1.07499356   | 0.246708  |
| 76(H ) | 1.85773678   | 0.426345  |
| 77(H ) | 2.20122546   | 0.505174  |
| 78(C ) | 2.81357561   | 0.645706  |
| 79(H ) | 2.33855067   | 0.536690  |
| 80(H ) | 3.82142455   | 0.877005  |
| 81(H ) | 0.86878274   | 0.199383  |
| 82(C ) | -8.10434971  | -1.859922 |
| 83(C ) | 5.25524933   | 1.206063  |
| 84(C ) | -5.73228736  | -1.315541 |
| 85(C ) | 24.31636546  | 5.580527  |
| 86(H ) | 2.86255225   | 0.656946  |
| 87(C ) | 3.52253831   | 0.808411  |
| 88(H ) | -4.69726562  | -1.078007 |
| 89(C ) | 18.93166899  | 4.344757  |
| 90(H ) | 25.83403751  | 5.928828  |
| 91(H ) | 1.57983647   | 0.362567  |
| 92(O ) | 29.44013990  | 6.756417  |
| 93(H ) | 22.41760179  | 5.144767  |
| Sum    | 435.73601262 | 100       |

---



**Table S4.** Polarizability of each atom in PCBZ-aptmds.

| Atom   | Polarizability (a.u.) | Proportion of polarizability (%) |
|--------|-----------------------|----------------------------------|
| 1(C)   | -1.30069105           | -0.112201                        |
| 2(C)   | -0.90442357           | -0.078018                        |
| 3(C)   | -1.60040166           | -0.138054                        |
| 4(C)   | 5.52326724            | 0.476449                         |
| 5(C)   | 16.35346276           | 1.410686                         |
| 6(C)   | 8.74270324            | 0.754165                         |
| 7(H)   | 1.97009292            | 0.169945                         |
| 8(H)   | 22.20964799           | 1.915854                         |
| 9(H)   | 7.71017305            | 0.665097                         |
| 10(C)  | 0.88346569            | 0.07621                          |
| 11(C)  | 1.348971              | 0.116365                         |
| 12(C)  | 2.24879187            | 0.193986                         |
| 13(H)  | 1.36047583            | 0.117358                         |
| 14(C)  | 2.55895157            | 0.220741                         |
| 15(H)  | 1.12697354            | 0.097215                         |
| 16(H)  | 1.78724676            | 0.154172                         |
| 17(C)  | 1.41069242            | 0.121689                         |
| 18(H)  | 5.04982391            | 0.435609                         |
| 19(H)  | 5.19951908            | 0.448522                         |
| 20(C)  | 1.60223285            | 0.138212                         |
| 21(H)  | 3.06117624            | 0.264064                         |
| 22(H)  | 7.53702419            | 0.65016                          |
| 23(H)  | 2.59615861            | 0.22395                          |
| 24(H)  | 1.4451548             | 0.124662                         |
| 25(H)  | 2.90428457            | 0.25053                          |
| 26(H)  | 0.95856609            | 0.082688                         |
| 27(O)  | 22.87856364           | 1.973556                         |
| 28(H)  | 0.19512385            | 0.016832                         |
| 29(C)  | 1.00815744            | 0.086966                         |
| 30(H)  | 0.93132098            | 0.080338                         |
| 31(H)  | 2.03105694            | 0.175203                         |
| 32(N)  | 2.36806279            | 0.204274                         |
| 33(C)  | 0.63739931            | 0.054983                         |
| 34(H)  | 0.13434299            | 0.011589                         |
| 35(H)  | -0.1792718            | -0.015464                        |
| 36(C)  | 2.41186744            | 0.208053                         |
| 37(H)  | 4.51258905            | 0.389266                         |
| 38(H)  | 6.56500829            | 0.566312                         |
| 39(C)  | -0.02879152           | -0.002484                        |
| 40(H)  | -2.27160847           | -0.195954                        |
| 41(H)  | -2.92096516           | -0.251969                        |
| 42(C)  | 2.64653214            | 0.228296                         |
| 43(H)  | 0.63152445            | 0.054477                         |
| 44(H)  | 10.41957864           | 0.898816                         |
| 45(H)  | 0.58002992            | 0.050035                         |
| 46(Si) | 0.45324434            | 0.039098                         |
| 47(O)  | 5.08762472            | 0.43887                          |
| 48(Si) | -0.37616147           | -0.032449                        |
| 49(C)  | 7.86951466            | 0.678842                         |

|        |             |           |
|--------|-------------|-----------|
| 50(H)  | 7.01578254  | 0.605197  |
| 51(H)  | -5.77967852 | -0.498568 |
| 52(H)  | 30.06915439 | 2.593832  |
| 53(C)  | 8.37270475  | 0.722248  |
| 54(H)  | -3.91269543 | -0.337518 |
| 55(H)  | 8.25336695  | 0.711954  |
| 56(H)  | 34.05552855 | 2.937706  |
| 57(C)  | 13.9140145  | 1.200254  |
| 58(H)  | 30.16661854 | 2.60224   |
| 59(H)  | 17.47362043 | 1.507313  |
| 60(H)  | 11.2220813  | 0.968042  |
| 61(C)  | 1.39528392  | 0.12036   |
| 62(H)  | -7.31498827 | -0.631007 |
| 63(H)  | 9.81336474  | 0.846523  |
| 64(H)  | 1.1762786   | 0.101468  |
| 65(C)  | 1.35675784  | 0.117037  |
| 66(H)  | 7.07985401  | 0.610724  |
| 67(H)  | -2.89602836 | -0.249818 |
| 68(C)  | 1.35072673  | 0.116517  |
| 69(H)  | -1.35741112 | -0.117093 |
| 70(H)  | 5.70725765  | 0.492321  |
| 71(C)  | 0.74226597  | 0.06403   |
| 72(H)  | -0.02016657 | -0.00174  |
| 73(H)  | 2.47696687  | 0.213669  |
| 74(N)  | 0.95558948  | 0.082431  |
| 75(C)  | 2.0445318   | 0.176366  |
| 76(H)  | 1.48054352  | 0.127715  |
| 77(H)  | 0.57284277  | 0.049415  |
| 78(H)  | 6.61994645  | 0.571051  |
| 79(C)  | 0.84020297  | 0.072478  |
| 80(H)  | 1.10547671  | 0.095361  |
| 81(H)  | 0.32942039  | 0.028417  |
| 82(C)  | -4.12395955 | -0.355742 |
| 83(C)  | 5.45188965  | 0.470292  |
| 84(C)  | -4.03555532 | -0.348116 |
| 85(C)  | 23.32358994 | 2.011945  |
| 86(C)  | -2.56088872 | -0.220908 |
| 87(H)  | -1.06073655 | -0.091501 |
| 88(C)  | 17.61694083 | 1.519677  |
| 89(H)  | 29.99773656 | 2.587672  |
| 90(H)  | 16.89718694 | 1.457589  |
| 91(O)  | 4.16899723  | 0.359627  |
| 92(H)  | 15.90669257 | 1.372147  |
| 93(C)  | 0.37936545  | 0.032725  |
| 94(C)  | 0.7567042   | 0.065275  |
| 95(C)  | 4.69437536  | 0.404947  |
| 96(C)  | 1.04548793  | 0.090186  |
| 97(H)  | 2.35837166  | 0.203438  |
| 98(H)  | 0.19338241  | 0.016682  |
| 99(C)  | 3.53162492  | 0.304646  |
| 100(H) | 10.02613177 | 0.864876  |
| 101(H) | 12.29843895 | 1.060891  |

|         |             |           |
|---------|-------------|-----------|
| 102(C)  | 1.37500477  | 0.118611  |
| 103(H)  | 1.43020023  | 0.123372  |
| 104(H)  | 0.90541223  | 0.078103  |
| 105(H)  | 14.61554535 | 1.260769  |
| 106(H)  | -1.61006615 | -0.138888 |
| 107(H)  | -0.70921382 | -0.061178 |
| 108(H)  | 4.67502194  | 0.403278  |
| 109(C)  | 3.42243699  | 0.295227  |
| 110(C)  | 11.06845673 | 0.95479   |
| 111(C)  | 0.71839133  | 0.06197   |
| 112(C)  | 5.82723104  | 0.50267   |
| 113(H)  | 13.72200762 | 1.183691  |
| 114(C)  | 1.10630529  | 0.095432  |
| 115(H)  | 1.44507986  | 0.124656  |
| 116(C)  | -0.32002422 | -0.027606 |
| 117(H)  | 7.03372712  | 0.606745  |
| 118(O)  | 1.55854004  | 0.134443  |
| 119(H)  | 0.75922616  | 0.065493  |
| 120(C)  | 1.4099273   | 0.121623  |
| 121(H)  | 2.3207279   | 0.200191  |
| 122(H)  | 5.41683114  | 0.467268  |
| 123(N)  | 0.02513029  | 0.002168  |
| 124(C)  | 3.66250827  | 0.315936  |
| 125(H)  | 0.99138289  | 0.085519  |
| 126(H)  | 17.21447128 | 1.484959  |
| 127(C)  | 2.18743095  | 0.188693  |
| 128(H)  | 9.27891988  | 0.80042   |
| 129(H)  | -2.22839356 | -0.192226 |
| 130(H)  | 3.54727518  | 0.305996  |
| 131(C)  | 4.13897857  | 0.357038  |
| 132(H)  | 20.59760733 | 1.776795  |
| 133(H)  | 3.37868578  | 0.291453  |
| 134(C)  | 0.17320685  | 0.014941  |
| 135(H)  | -0.02110407 | -0.00182  |
| 136(H)  | -4.64263362 | -0.400484 |
| 137(Si) | -1.88765998 | -0.162834 |
| 138(O)  | -0.07902159 | -0.006817 |
| 139(Si) | 1.93799954  | 0.167176  |
| 140(C)  | 1.94976603  | 0.168191  |
| 141(H)  | 0.62310964  | 0.053751  |
| 142(H)  | 1.0418876   | 0.089876  |
| 143(H)  | 1.29946821  | 0.112095  |
| 144(C)  | 2.53448734  | 0.218631  |
| 145(H)  | 9.97588538  | 0.860542  |
| 146(H)  | 5.06496171  | 0.436915  |
| 147(C)  | 4.37556493  | 0.377446  |
| 148(H)  | 16.26992459 | 1.40348   |
| 149(H)  | 2.16343595  | 0.186623  |
| 150(H)  | -1.53531039 | -0.132439 |
| 151(C)  | 11.14387263 | 0.961295  |
| 152(H)  | 4.50708007  | 0.388791  |
| 153(H)  | 17.78159383 | 1.53388   |

|         |             |           |
|---------|-------------|-----------|
| 154(H ) | 26.47042188 | 2.283398  |
| 155(C ) | 3.72931196  | 0.321699  |
| 156(H ) | -6.99436925 | -0.60335  |
| 157(H ) | 17.29783107 | 1.492149  |
| 158(H ) | 7.10345851  | 0.61276   |
| 159(C ) | 0.96350347  | 0.083114  |
| 160(H ) | 0.10929762  | 0.009428  |
| 161(H ) | 0.09135677  | 0.007881  |
| 162(C ) | 1.80312882  | 0.155542  |
| 163(H ) | 4.44921203  | 0.383799  |
| 164(H ) | 6.06325316  | 0.52303   |
| 165(N ) | 1.732548    | 0.149453  |
| 166(C ) | 1.36381932  | 0.117646  |
| 167(H ) | 4.32899396  | 0.373429  |
| 168(H ) | 0.1002029   | 0.008644  |
| 169(C ) | 1.8702929   | 0.161336  |
| 170(H ) | 2.49253275  | 0.215011  |
| 171(H ) | 2.82588855  | 0.243767  |
| 172(H ) | 2.8496884   | 0.24582   |
| 173(C ) | 0.47165358  | 0.040686  |
| 174(C ) | 3.91683699  | 0.337875  |
| 175(C ) | 2.80607474  | 0.242058  |
| 176(C ) | 11.15744241 | 0.962466  |
| 177(C ) | 5.9469829   | 0.513     |
| 178(H ) | -0.99636876 | -0.085949 |
| 179(C ) | 13.21820946 | 1.140232  |
| 180(H ) | 7.79494015  | 0.672409  |
| 181(H ) | 7.77152562  | 0.670389  |
| 182(O ) | 1.94078582  | 0.167417  |
| 183(H ) | 2.34986577  | 0.202705  |
| 184(C ) | -0.10909049 | -0.00941  |
| 185(C ) | 0.95220793  | 0.08214   |
| 186(C ) | 5.51856044  | 0.476043  |
| 187(C ) | 0.6589246   | 0.05684   |
| 188(H ) | 9.0218247   | 0.778243  |
| 189(H ) | -3.39720055 | -0.29305  |
| 190(C ) | 6.916157    | 0.596603  |
| 191(H ) | 19.39470539 | 1.67303   |
| 192(H ) | 8.21378468  | 0.708539  |
| 193(C ) | 4.89699349  | 0.422426  |
| 194(H ) | -1.13326509 | -0.097758 |
| 195(H ) | -4.15117012 | -0.358089 |
| 196(H ) | 31.43783245 | 2.711897  |
| 197(H ) | -4.91224958 | -0.423742 |
| 198(H ) | 6.27764694  | 0.541524  |
| 199(H ) | 21.00674734 | 1.812089  |
| 200(C ) | 6.01313491  | 0.518706  |
| 201(C ) | 0.31726496  | 0.027368  |
| 202(C ) | 8.63731556  | 0.745074  |
| 203(C ) | 0.86442584  | 0.074567  |
| 204(H ) | 0.04527999  | 0.003906  |
| 205(C ) | 2.43720107  | 0.210238  |

|         |             |           |
|---------|-------------|-----------|
| 206(H ) | 11.30578141 | 0.975262  |
| 207(C ) | 0.05441341  | 0.004694  |
| 208(H ) | 1.52091746  | 0.131198  |
| 209(O ) | 4.73087362  | 0.408096  |
| 210(H ) | 0.18507535  | 0.015965  |
| 211(C ) | 1.47364858  | 0.12712   |
| 212(H ) | 3.85661841  | 0.33268   |
| 213(H ) | 3.68415674  | 0.317804  |
| 214(N ) | -0.20180536 | -0.017408 |
| 215(C ) | 4.21982202  | 0.364011  |
| 216(H ) | 2.04789524  | 0.176656  |
| 217(H ) | 9.46254226  | 0.81626   |
| 218(H ) | 8.30563091  | 0.716462  |
| 219(C ) | 0.90784822  | 0.078313  |
| 220(H ) | 0.33563774  | 0.028953  |
| 221(H ) | 1.47736492  | 0.127441  |
| 222(C ) | 1.8207862   | 0.157065  |
| 223(H ) | 5.92151395  | 0.510803  |
| 224(H ) | 0.32981881  | 0.028451  |
| 225(C ) | 1.649458    | 0.142286  |
| 226(H ) | 1.88748948  | 0.162819  |
| 227(H ) | 0.36847965  | 0.031786  |
| 228(Si) | 0.88460348  | 0.076308  |
| 229(O ) | 2.93433728  | 0.253122  |
| 230(Si) | 0.77720706  | 0.067044  |
| 231(C ) | 1.44389595  | 0.124554  |
| 232(H ) | 5.60950079  | 0.483888  |
| 233(H ) | 1.11826205  | 0.096464  |
| 234(C ) | 2.4713565   | 0.213185  |
| 235(H ) | -3.16780205 | -0.273262 |
| 236(H ) | 5.43021367  | 0.468422  |
| 237(H ) | 4.77704089  | 0.412078  |
| 238(C ) | 11.05820176 | 0.953905  |
| 239(H ) | 17.29581725 | 1.491976  |
| 240(H ) | 4.52945825  | 0.390721  |
| 241(H ) | 18.23741187 | 1.5732    |
| 242(C ) | 3.85631611  | 0.332654  |
| 243(H ) | 12.34567255 | 1.064965  |
| 244(H ) | 2.31526677  | 0.19972   |
| 245(H ) | -0.82441844 | -0.071116 |
| 246(C ) | 1.88972981  | 0.163012  |
| 247(H ) | 4.42820522  | 0.381987  |
| 248(H ) | 0.03481238  | 0.003003  |
| 249(H ) | 0.05959371  | 0.005141  |
| 250(C ) | 0.91689587  | 0.079093  |
| 251(H ) | 0.48536957  | 0.041869  |
| 252(H ) | 0.68851181  | 0.059393  |
| 253(C ) | 0.82954862  | 0.071559  |
| 254(H ) | 0.31541852  | 0.027209  |
| 255(H ) | 0.73666209  | 0.063546  |
| 256(N ) | 2.19112152  | 0.189011  |
| 257(C ) | 2.61462402  | 0.225543  |

|         |               |          |
|---------|---------------|----------|
| 258(H ) | 10.3705099    | 0.894583 |
| 259(H ) | -1.57055606   | -0.13548 |
| 260(H ) | 0.63462202    | 0.054744 |
| 261(C ) | 4.17496862    | 0.360142 |
| 262(H ) | 16.03595567   | 1.383297 |
| 263(H ) | 2.61781279    | 0.225818 |
| 264(H ) | 1.24613468    | 0.107494 |
| Sum     | 1159.25595625 | 100      |

**Table S5.** Summary of simulation results and dielectric properties.

| Samples     | Density <sup>[a]</sup><br>(g cm <sup>-3</sup> ) | Density <sup>[b]</sup><br>(g cm <sup>-3</sup> ) | $\alpha'$<br>(m <sup>3</sup> ) | $M_{ru}$<br>(g mol <sup>-1</sup> ) | $\epsilon_s$ | $\epsilon_{1\text{ Hz}}$ <sup>[c]</sup> | $\epsilon_\infty$ | $\epsilon_{1\text{ MHz}}$ <sup>[d]</sup> |
|-------------|-------------------------------------------------|-------------------------------------------------|--------------------------------|------------------------------------|--------------|-----------------------------------------|-------------------|------------------------------------------|
| PC-aptmDs   | 1.03                                            | 1.07                                            | 5.56E-29                       | 478.34                             | 2.90         | 2.66                                    | 2.30              | 2.58                                     |
| PBZ-aptmDs  | 1.07                                            | 1.11                                            | 6.49E-29                       | 570.37                             | 3.24         | 3.02                                    | 2.33              | 2.83                                     |
| PCBZ-aptmDs | 1.04                                            | 1.08                                            | 1.81E-28                       | 1615.04                            | 3.01         | 2.72                                    | 2.25              | 2.62                                     |

[a]. Calculated by molecular dynamics simulation.

[b]. Tested by the density balance.

[c]. Experimental value of dielectric constant at 1 Hz.

[d]. Experimental value of dielectric constant at 1 MHz
